# Supplementary material
Source: PubMed Central journal article supplement (PMC129735)
Supplement: pnas_212511099_1.pdf [file pnas_212511099_1.pdf]

**Table 2. The *Drosophila* tetraspanin gene family**

| <b>Gene name (synonym)</b> | <b>Location</b> | <b>RNA expression domains</b> |
|----------------------------|-----------------|-------------------------------|
| CG11415 (Tsp2A)            | 2A2             | 7, 10                         |
| CG10742 (Tsp3A)            | 3A9             | 1, 12                         |
| CG4690 (Tsp5D)             | 5D2             | 5                             |
| CG9093 (Tsp26A)            | 26B1            | 11                            |
| CG9494 (Tsp29Fa)           | 29F5            | 7                             |
| CG9496 (Tsp29Fb)           | 29F6            | 7                             |
| CG14936 (Tsp33B)           | 33B1            | 12                            |
| CG8666 (Tsp39D)            | 39D3            | 5                             |
| CG14468 (Tsp42A)           | 41F11           | 12                            |
| CG18816 (Tsp42Eb)          | 42D-E           | 11                            |
| CG18817 (Tsp42Ea)          | “               | 4, 7, 11                      |
| CG12847 (Tsp42Ec)          | “               | 7                             |
| CG12846 (Tsp42Ed)          | “               | 7                             |
| CG10106 (Tsp42Ee)          | “               | 1, 3, 12                      |
| CG12845 (Tsp42Ef)          | “               | 7, 12                         |
| CG12142 (Tsp42Eg)          | “               | 4, 7, 11                      |
| CG12844 (Tsp42Eh)          | “               | 12                            |
| CG12843 (Tsp42Ei)          | “               | 12                            |
| CG12143 (Tsp42Ej)          | “               | 1, 3                          |
| CG12841 (Tsp42Ek)          | “               | 11                            |
| CG12840 (Tsp42El)          | “               | 7, 9, 10                      |
| CG2374/ (lbn)              | “               | 1, 3, 4                       |
| CG12839 (Tsp42En)          | “               | 11                            |
| CG12838 (Tsp42Eo)          | “               | 11                            |
| CG4471 (Tsp42Ep)           | “               | 1, 11                         |
| CG12832 (Tsp42Eq)          | “               | 11                            |
| CG12837 (Tsp42Er)          | “               | 11                            |
| CG9033 (Tsp47F)            | 47F5            | 4                             |
| CG11303/TM4SF              | 60A7            | 1, 11                         |
| CG16991 (Tsp66A)           | 65F11           | 12                            |
| CG4999 (Tsp66E)            | 66E3            | 7, 8                          |
| CG5492 (Tsp74F)            | 75A7            | 7, 10                         |
| CG4591 (Tsp86D)            | 86C7            | 1, 2                          |
| CG6120 (Tsp96F)            | 96F6            | 1, 7                          |
| CG6323 (Tsp97E)            | 97D11           | 1                             |

The names, synonyms, chromosomal locations, and embryonic mRNA expression domains are given. The codes for the embryonic mRNA expression domains are: **1**, brain and ventral cord; **2**, stomatogastric nervous system; **3**, motoneurons; **4**, peripheral nervous system; **5**, midline glia; **6**, sensilla in the head; **7**, gut; **8**, tracheal

system; **9**, lymph gland; **10**, anal plate; **11**, very low-level ubiquitous expression, predominantly in epidermis; and **12**, high-level uniform expression. The shaded portion contains the tetraspanins present in the 42D-E chromosomal interval.
